# Supplementary material
Source: MDPI journal article supplement (https://www.mdpi.com/2073-4395/14/5/1061)
Supplement: s1 [file s1]

Table S1 Phenotype data of parents and F<sub>1</sub> plant under low-light treatment

| Traits                                  | lines          | R1    | R2    | R3    | R4    | R5    | R6    | R7    | R8    | R9    | Average |
|-----------------------------------------|----------------|-------|-------|-------|-------|-------|-------|-------|-------|-------|---------|
| Plant height<br>(PLH/cm)                | WI             | 17.80 | 32.20 | 23.30 | 17.40 | 18.70 | 32.90 | /     | 35.80 | 33.40 | 26.44   |
|                                         | F <sub>1</sub> | 50.65 | 54.05 | 51.65 | 53.05 | 48.30 | 48.65 | 58.85 | 54.65 | 53.90 | 52.64   |
|                                         | M14            | 64.10 | /     | 54.20 | 47.60 | 76.20 | 69.10 | 84.70 | 66.60 | 66.40 | 66.11   |
| 2nd internode<br>length<br>(nd2_NdL/cm) | WI             | 0.90  | 2.00  | 1.80  | 1.02  | 1.23  | 2.00  | /     | 2.12  | 1.80  | 1.61    |
|                                         | F <sub>1</sub> | 1.50  | 1.30  | 1.50  | 1.40  | 1.25  | 1.25  | 2.00  | 1.75  | 1.75  | 1.52    |
|                                         | M14            | 1.30  | 2.00  | 2.60  | 1.50  | 1.50  | 1.50  | 1.30  | 1.00  | 1.30  | 1.38    |

**Note:** R1、R2……, Repetition1、Repetition2……; WI, the low-light-tolerance line; F<sub>1</sub>, the hybrid of parents WI and M14; M14, the low-light-intolerance line.

Table S2. Quantity analysis of sequencing samples

| Sample ID                 | Total reads | Q30 (%) | G C content (%) |
|---------------------------|-------------|---------|-----------------|
| WI                        | 28 924 098  | 89.04   | 37.60           |
| M14                       | 28 536 117  | 89.53   | 38.27           |
| F <sub>2</sub> population | 2 119 013   | 94.04   | 41.50           |
| Control                   | 1 174 010   | 94.26   | 42.79           |
| Total                     | 296 908 762 | 93.96   | 41.44           |

Note: Q30, represent the identification reliability of a base reaches 99.9% in high-throughput sequencing. G C, base G C; WI, the low-light-tolerance line; F<sub>2</sub>, the second filial generation of parents WI and M14; M14, the low-light-intolerance line.

Table S3 Statistic of SNP Markers for the parental lines and offspring

| Types              | Number    | Types   | Number |
|--------------------|-----------|---------|--------|
| Total SNP markers  | 1 076 599 | ab × cc | 137    |
| Parent marker lack | 206 481   | cc × ab | 36     |
| 4 × Depth not meet | 56 612    | ef × eg | 57     |
| No-poly marker     | 208 868   | hk × hk | 13 264 |
| Remain marker      | 604 638   | lm × ll | 69 632 |
| aa × bb            | 496 263   | nn × np | 25 249 |

Note: SNP, single nucleic acid polymorphism; aa × bb; ab × cc; cc × ab; ef × eg; hk × hk; lm × ll; nn × np, SNP genotyping.
